# Supplementary material
Source: MDPI journal article supplement (https://www.mdpi.com/2073-4441/13/15/2139)

**Figure D-1.** Contemporary annual outflow–runoff relationship (WYs 1912–1944). See Equation (2) and Table 3 for model fitting parameters.

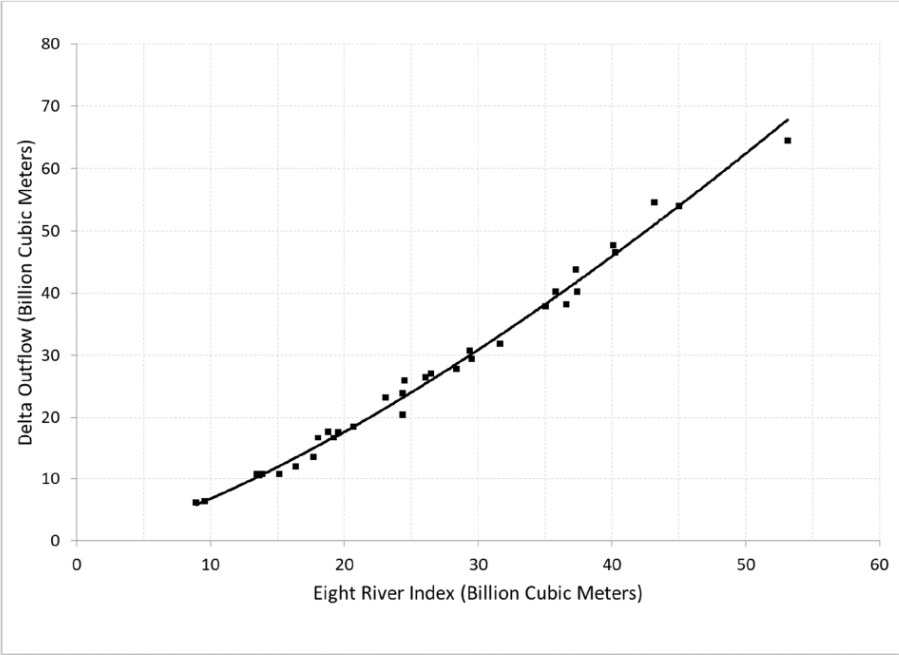

**Figure D-2.** Time series of model residuals (as a fraction of predicted outflow) associated with contemporary annual runoff–outflow relationship (Model 3). The time series is differentiated by low runoff years (less than 24.6 BCM or 20 million acre-ft) and high runoff years (greater than 24.6 BCM).

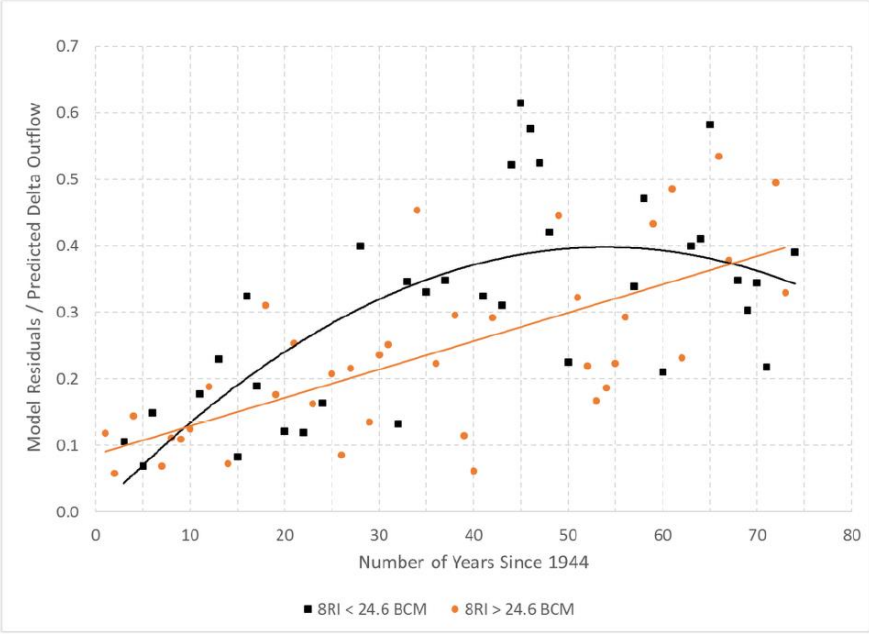

**Figure D-3.** Contemporary February–June X2–outflow relationships (Model 3). Equation (3) and Table 5 for model fitting parameters.

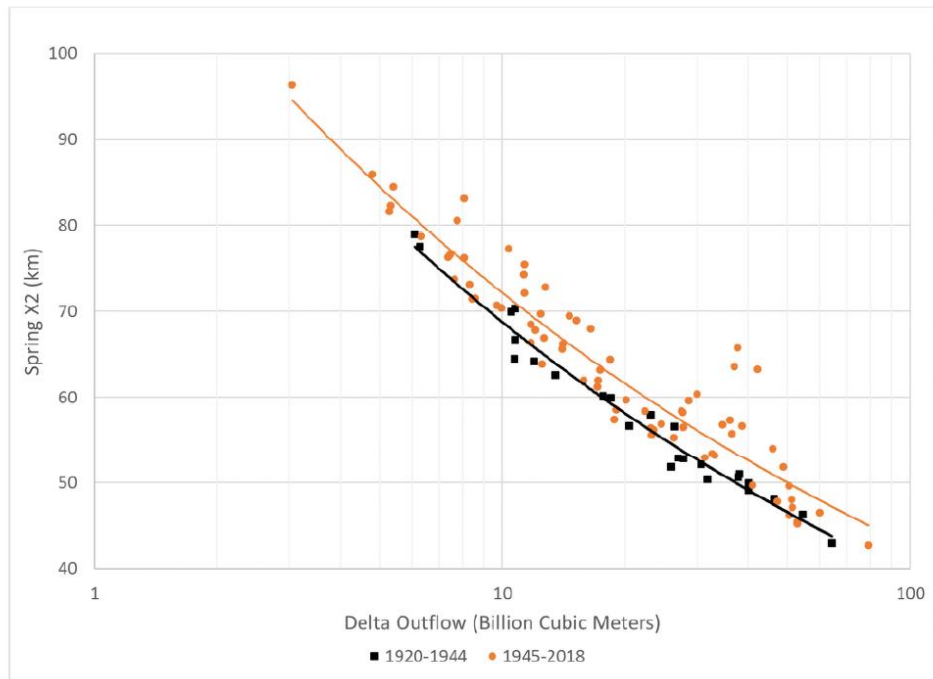

**Figure D-4.** Contemporary July–October X2–outflow relationships (Model 3). Equation (3) and Table 5 for model fitting parameters.

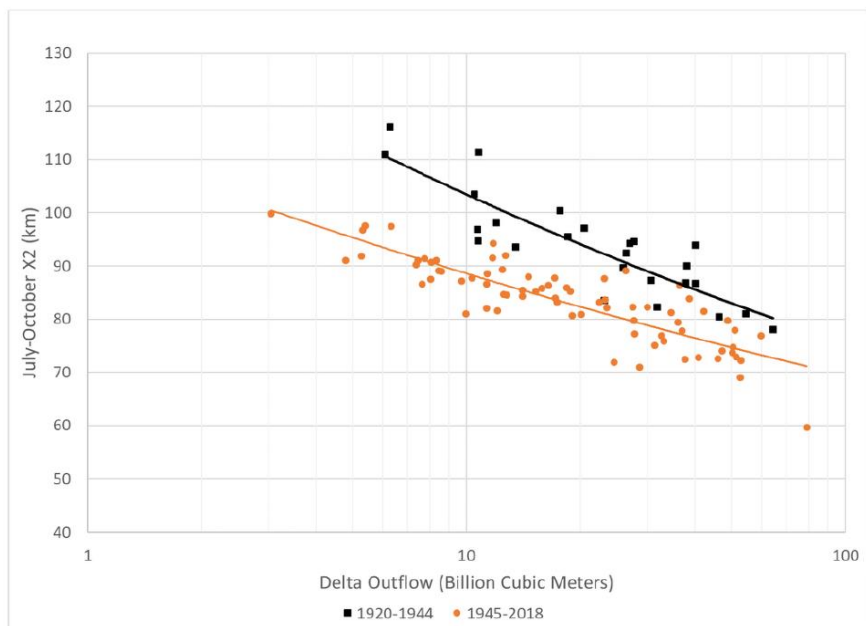

Supplement: s1 [file s1]
